# **Dispersal of southern elephant seals (*Mirounga leonina*) from Davis Base, Antarctica: Combining population genetics and tracking data**

**Michelle Chua<sup>1,\*</sup>, Simon Y. W. Ho<sup>1</sup>, Clive R. McMahon<sup>2</sup>, Ian Jonsen<sup>3</sup>, and Mark de Bruyn<sup>1,\*</sup>**

<sup>1</sup> School of Life and Environmental Sciences, The University of Sydney, Sydney, NSW 2006, Australia

<sup>2</sup> IMOS Animal Tagging, Sydney Institute of Marine Science, 19 Chowder Bay Road, Mosman, NSW 2088, Australia

<sup>3</sup> Department of Biological Sciences, Macquarie University, Sydney, NSW 2109, Australia

\* Corresponding authors: [mchu5285@uni.sydney.edu.au](mailto:mchu5285@uni.sydney.edu.au), [mark.debruyn@sydney.edu.au](mailto:mark.debruyn@sydney.edu.au)

ORCID: Chua (0000-0002-3135-6478); Ho (0000-0002-0361-2307); McMahon (0000-0001-5241-8917); Jonsen (0000-0001-5423-6076); de Bruyn (0000-0003-1528-9604).

## Abstract

Marine animals such as the southern elephant seal (*Mirounga leonina*) rely on a productive marine environment and are vulnerable to oceanic changes that can affect their reproduction and survival rates. Davis Base, Antarctica, acts as a moulting site for southern elephant seals that forage in Prydz Bay, but the genetic diversity and natal source populations of these seals has not been characterized. Determining the genetic diversity of moulting populations like this one provides essential information on seal dispersal, inter-population mixing, and foraging behaviours. In this study, we combined genetic and animal tracking data on these moulting seals to identify levels of genetic diversity, natal source population, and movement behaviours during foraging and haul-out periods. Using mitochondrial sequence data, we identified two major breeding lineages of seals at Davis Base. We found that the majority of the seals originated from breeding stocks within the South Atlantic Ocean and South Indian Ocean. One seal was grouped with the Macquarie Island breeding stock (South Pacific Ocean). The Macquarie Island population, unlike the other two stocks, is decreasing in size. Tracking data revealed long-distance foraging activity of the Macquarie Island seal around Crozet Islands. We speculate that changes to the Antarctic marine environment have resulted in a shift in foraging and dispersal strategies, which subsequently affects seal population growth rates. These findings have implications for conservation management plans aimed at improving the population status of the southern elephant seal.

**Keywords:** southern elephant seals, genetic diversity, mitochondrial DNA, population genetics, moulting, animal tracking

## Introduction

Warmer oceans result in loss of sea ice, which is likely to have large impacts on reproduction and survival rates in species that depend on sea ice for foraging (Bryndum-Buchholz et al. 2019). In other species, loss of sea ice has reduced barriers to dispersal, which has resulted in geographical isolation of some marine animal populations (Laidre et al. 2018). As global temperatures continue to increase, changes to habitat structure in ice-locked regions are likely to cause shifts in marine animal movements, effective dispersal, foraging behaviours, and population numbers (Hindell et al. 2017; Hindell et al. 2020). These changes can lead to a restructuring or even loss of genetic diversity between populations (Laidre et al. 2018; Siegert et al. 2019).

Antarctic sea ice increased from the late 1970s to a peak in 2014, but large declines in 2017 and 2018 were possibly caused by the El Niño Southern Oscillation (Parkinson 2019). Polar marine animals, such as pinnipeds, occupy the upper trophic levels in the Antarctic region and therefore integrate large environmental signals (Bestley et al. 2020). Sea ice is crucial to the survival of these predators, especially those that require sea ice for breeding, foraging, and moulting (Bestley et al. 2020). A recent study using a climate model projected that the colonies of many Antarctic species, including emperor penguins, would become quasi-extinct by 2100 because of the reduced availability of sea ice and foraging habitat (Jenouvrier et al. 2021). Similarly, changes in the extent of sea ice have altered the foraging behaviour and survival rates of a number of pinnipeds, such as the southern elephant seal (*Mirounga leonina*), which has ultimately affected the population dynamics of these species (McMahon and Burton 2005; Bestley et al. 2020; Bester 2021).

Southern elephant seals (SES) have a circumpolar distribution and haul out twice a year on sub-Antarctic islands to breed and to moult (Le Boeuf and Law 1994). The four main breeding stocks are South Georgia, Kerguelen Islands and Heard Island, Macquarie Island, and Peninsula Valdés in Argentina (McMahon et al. 2017), with smaller breeding colonies on other sub-Antarctic islands (Slade et al. 1998; Hoelzel et al. 2001) (Fig. 1). Population decreases of SES were first documented in the mid-1980s (McMahon et al. 2005a). Population estimates between the 1980s and early 2000s demonstrated stable and increasing population sizes across three of the main breeding stocks and most of the smaller breeding stocks (McMahon et al. 2005a). However, the Macquarie Island breeding stock has continued to decrease and has been listed as vulnerable due to dramatic decreases in population size (McMahon et al. 2005a; van den Hoff and Burton 2007). Initial decreases were likely to have been driven by hunting for the seal's oil-rich blubber in the early 19th Century (Hindell and Burton 1988; van den Hoff and Burton 2007), but recent population declines were most likely caused by changes in food supply (McMahon et al. 2005a).

During the 2.5-month period between the breeding and moulting seasons, and the eight-month period between moulting and breeding, SES spend the majority of their time foraging at sea. The timing and location of the seals' foraging movements depend on energy requirements and the availability of food sources (Goedegebuure et al. 2018; de Kock et al. 2021). Polar research stations such as Casey Station (66° 16' 57" S, 110° 31' 36" E) and Davis Base (68° 34' 36" S, 77° 58' 03" E) act as moulting sites for some seal colonies (Rodríguez et al. 2017). Davis Base is an ice-free area that is situated near Vestfold Hills, covering roughly 400 km<sup>2</sup> (Australian Antarctic Program 2020). Previous studies indicated that the male seals at Davis Base originated from the Kerguelen Islands, Heard Island, and some of the smaller populations in the Kerguelen stock at Marion and Crozet islands (Tierney

1977; Bester 1988). The seals' annual visits might be due to the abundance of food along Prydz Bay during the austral summer (Bester 1988). The underlying genetic make-up of this and indeed other moulting aggregations and the possibility of sex-biased gene flow can potentially be identified through genetic analysis. The results of such an analysis would allow comparison with traditional capture-mark-recapture studies that formed the basis of much previous work on population composition at Davis Station.

The genetic structure of the breeding colonies of SES have been investigated previously (Hoelzel et al. 1993; Slade et al. 1998; Fabiani 2002; Chauke 2008; Bogdanowicz et al. 2013). However, there remains a gap in our knowledge regarding the natal origins of seals at moulting sites such as Davis Base, where seals potentially from multiple breeding sites aggregate (Bester 1988). Since SES are polygynous and display philopatry, breeding colonies have high female-to-male ratios (one male beachmaster to a female harem of up to 100 seals) (Bogdanowicz et al. 2013). Therefore, the reproductive success and dispersal of a single male can affect disproportionately the genetic structure of an entire breeding colony. These genetic effects on population composition can be investigated using molecular markers such as mitochondrial DNA (mtDNA), which is maternally inherited. Sequences of the mitochondrial control region effectively delineate the major breeding stocks of SES (Hoelzel et al. 1993; Slade et al. 1998; Bogdanowicz et al. 2013).

In this study, we aim to resolve the natal origins of SES that haul out at the moulting site at Davis Base, Antarctica. We analyse mtDNA from blood samples and tracking data from these seals to determine their genetic diversity and dispersal patterns, and draw comparisons with previous studies of the genetic structure of surrounding breeding colonies. Our study shows that genetic and physical tracking data provide complementary information on the natal affiliations of the seals and their resource usage around the Kerguelen Plateau.

## Materials and methods

### Blood sample collection and animal tracking tags

We captured, collected blood samples from, and attached animal tracking devices to 12 male SES (10 subadults and 2 juveniles) at Davis Base in 2016 and 2017. Animal tracking data were collected over one year of the seals' lifecycle, from the start of their trip (moulting at Davis Base) to returning to moult the following year. After collection, blood from each sampled seal was spotted onto Whatman FTA cards (Stowell et al. 2018) and stored at  $-20^{\circ}\text{C}$  until required for DNA extraction. The 12 blood samples were then sent to the University of Sydney for the purpose of this study.

### DNA library assembly

We prepared seal blood samples using the standard sterile technique, which involved taking a sterilized (Bunsen flame) standard office one-hole punch from the centre of the dried blood sample (Stowell et al. 2018). We extracted and purified the sampled DNA using the Qiagen DNeasy Blood & Tissue Kit following the Spin-Column protocol for blood with non-nucleated erythrocytes (Supplementary Information S1). To amplify mtDNA (Supplementary Information S2), we used the primers ancF (5'-GCTGACATTCTACTTAACT-3') and mdbR (5'-CAGTATAGAAACCCACATGA-3') (de Bruyn et al. 2009). We ran PCRs for approximately 3 h using the following cycle protocol: 10 min at  $95^{\circ}\text{C}$  followed by 35 cycles

of 30 s at 52°C, 30 s at 72°C, 1 min at 72°C, followed by an additional extension step for 10 min, and then 4°C for cooldown. After successful PCR, we cleaned up the PCR product following the ExoSAP-IT Express PCR Product Cleanup kit and standard protocol. The cleaned PCR products were stored at 4°C prior to DNA sequencing by Macrogen (Seoul, South Korea).

We collected a total of 201 additional sequences of the mitochondrial control region from GenBank (Hoelzel et al. 1993; Slade et al. 1998; Fabiani 2002; Chauke 2008; Curtis et al. 2009; Bogdanowicz et al. 2013; Zappes et al. 2017). These comprised 191 sequences from southern elephant seals and 10 sequences from Weddell seals (*Leptonychotes weddellii*), which we included as an outgroup because they belong to the same subfamily of Phocidae (Slade et al. 1994). The southern elephant seal data had been sampled from the following locations: Marion Island ( $n = 50$ ), King George Island ( $n = 23$ ), Macquarie Island ( $n = 53$ ), Elephant Island ( $n = 12$ ), Falkland Islands ( $n = 16$ ), Península Valdés ( $n = 32$ ), Heard Island ( $n = 6$ ), and South Georgia ( $n = 28$ ). We aligned the 12 newly generated sequences and the 201 published sequences using Geneious Prime (Kearse et al. 2012).

## Genetic analyses

Uncorrected pairwise distances were calculated from sampled sequences of the mitochondrial control region using MEGA X (Kumar et al. 2018). We used pairwise deletion to account for gaps in sequences. We used DnaSP version 6.12 (Rozas et al. 2017) to calculate the number of segregating sites, number of haplotypes and haplotype diversity, nucleotide diversity and average nucleotide differences, and neutrality tests using Fu's  $F_s$  (Fu 1997). Rarefaction was used to correct for unequal sample sizes by comparing haplotype richness between the samples from Davis Base and from all other populations. The sampled haplotype sequences were rarefied to generate the expected haplotype richness using the function *rarefy* (Hurlbert 1971; Heck et al. 1975) in R package vegan (Oksanen et al. 2020).

To visualize the relationships among mitochondrial haplotypes, we constructed a median-joining haplotype network using the software package POPART (Leigh and Bryant 2015). We assigned each seal sequence to one of nine geographical locations: Marion Island (MR), King George Island (KG), Macquarie Island (MQ), Elephant Island (EI), Falkland Islands (FI), Península Valdés (PV), Heard Island (HD), South Georgia (SG), and Davis Base. The sequence data collected from GenBank were assigned locations according to where they were collected for the referenced study.

## Animal tracking

We immobilized the 12 seals as part of an integrated oceanography and animal behaviour study (McMahon et al. 2021). From each seal, we took morphometric measurements including standard body length, maximum girth, and weight (Field et al. 2002). Each seal was anaesthetised using Zoletil 100, or available combinations of Tiletamine and Zolazepam (McMahon et al. 2000). We then attached identification tags to the hind flippers using Dalton Jumbo Robotags (Wilkinson and Bester 1997). We tracked the 12 seals over a year of their lifecycle from post-moulting to the next moulting haul-out season the following year (Table 1). Conductivity-Temperature-Depth Satellite Data Relay Loggers (CTD-SRDL, Sea Mammal Research Unit, University of St Andrews, UK) were glued to the top of the seal's head for improved satellite reception and transmission at sea (Horning et al. 2019). The tag

attachments to the seals did not affect their reproduction or survival patterns (McMahon et al. 2008). Tracking data received from the tags, such as location and diving behaviour, were transmitted via the ARGOS satellite network (Myers et al. 2006; Henderson et al. 2020).

We analysed the tracking data using the R package *foieGras* (Jonsen and Patterson 2020). We first used the *fit\_ssm* function to fit a continuous-time correlated random walk state-space model (SSM; Jonsen et al. 2020) to the ARGOS satellite-derived locations. This model accounted for well-known measurement errors in the ARGOS locations and predicted locations at regular 12-h time intervals along the seal tracks (as per Jonsen et al. 2019). We then used the *fit\_mpm* function to fit a movement persistence model (Jonsen et al. 2019) to the predicted locations to infer changes in the seals' movement behaviour, possibly arising in response to stimuli such as changes in prey density or ice concentration, along their estimated tracks. Movement persistence ( $\gamma_t$ ) is the autocorrelation in both speed and direction (scaled from 0 to 1) between successive displacements along a movement pathway. Low  $\gamma_t$  values represent low speed and/or directionality that are typical of resident or area-restricted searching behaviours, whereas high  $\gamma_t$  values represent higher speed and/or directionality that are typical of directed travel associated with dispersal or migration. Using the SSM-predicted locations, we also calculated the following track summary statistics: maximum displacement from deployment location; total deployment duration; maximum displacement scaled by deployment duration; and path tortuosity (mean vector of turning angles along each seal's track).

## Results

### Population genetic diversity

Nucleotide sequences of the mitochondrial control region (348 bp), sampled from the 12 SES at Davis Base, showed extensive divergence between sample 48\_SES and the other 11 samples (the latter were all closely related to each other). Analysis of these 12 sequences and 191 published southern elephant seal sequences revealed a close relationship between sample 48\_SES and sequences from Macquarie Island seals. The largest pairwise genetic distance (0.065 substitutions per site) is seen between seals from Macquarie Island and Península Valdés (Table 2). This is expected, given that the two locations are geographically the farthest apart. The pairwise distance between the Davis Base and Macquarie Island seals (0.049 substitutions per site) is greater than that between the Davis Base seals and other population groups. This confirms the divergence between sample 48\_SES and the other 11 Davis Base seals.

We identified a total of 65 haplotypes in the combined data set of 203 mitochondrial sequences (Table 3). From the 12 seals from Davis Base, 11 haplotypes were identified. A single haplotype was carried by 26 individual seals that were previously sampled from King George Island, Marion Island, Falkland Islands, Heard Island, and one individual from Elephant Island. Six haplotypes from Davis Base seals were shared with those from Marion Island, and three haplotypes with those from the Falkland Islands. The final Davis Base haplotype grouped with Macquarie Island, as described above. The seals from Davis Base had high haplotype diversity ( $0.99 \pm 0.04$ ) and had higher nucleotide diversity ( $2.52 \pm 0.004$ ) than the seals from the other populations (Macquarie Island, Marion Island, Heard Island, King George Island, and Península Valdés). Owing to the small number of seal samples from Davis Base, haplotype richness for all population groups was corrected for sample size, and



Davis Base seals were elevated compared with all other populations, as well as for the average number of nucleotide differences.

## Haplotype network

We assigned traits (locations) to the 12 sequences from Davis Base seals based on their grouping with the known locations of seal sequences from GenBank (Fig. 2). From the combined analysis of all population groups and the Davis Base seals, 12 haplotypes were unique to the Macquarie Island stock. One Davis Base seal (48\_SES) shared a haplotype with four seals from Macquarie Island. Eleven haplotypes were unique among seals from Marion Island. Out of the 11 Marion Island haplotypes, four haplotypes were shared by seals from the Falkland Islands, three shared by seals from each of Elephant Island, Heard Island, and King George Island, and two shared by seals from South Georgia. Islands in the South Atlantic Ocean region mostly shared haplotypes with one another, with only 7.69% of haplotypes shared with populations on islands in the South Indian Ocean. We found no common haplotypes between Macquarie Island (South Pacific Ocean), the South Atlantic Ocean, and South Indian Ocean islands.

## Animal tracking analyses

We analysed track summaries, estimated move persistence, and predicted locations of the 12 seal samples from Davis Base (Table 4). Track summaries indicated that the average maximum displacement of the seals from Davis Base was 1,330 km, with 44\_SES travelling the greatest distance (3,056 km). The average maximum displacement scaled by duration was found to be 8.10 km/day, with the greatest being 14.46 km/day (62\_SES), and the smallest being 1.30 km/day (seal 60). The average path tortuosity was found to be 0.08, with 58\_SES having the highest path tortuosity (0.19), and 44\_SES and 54\_SES with the lowest (0.02).

The sampled seals showed high move persistence during their outbound trips into open waters, and low move persistence when approaching areas with high sea-ice coverage or when returning to breeding and moulting areas (Fig. 3). Predicted locations have indicated visits to Kerguelen Islands by 44\_SES, 50\_SES, 56\_SES, and 62\_SES (Fig. 4). Seal 48\_SES made visits to Crozet Islands and appeared to spend the majority of its journey around those islands. The predicted locations also indicated that five individuals did not venture out of the Davis Base ice shelf regions. This might be due to seal mortality or detachment of the tags.

## Discussion

By combining genetic and animal tracking data, we determined the natal locations and at-sea movements of moulting seals at Davis Base, Antarctica. Our analysis of genetic data revealed a mixed sample of likely natal locations from the 12 Davis Base seals, including South Georgia, Macquarie Island, Marion Island, King George Island, and the Falkland Islands. We also identified two distinct lineages, representing three of the four main breeding stocks (Macquarie Island, South Atlantic Ocean islands, and South Indian Ocean islands). Our tracking data showed that all seals, despite their varied lineages, remained within the vicinity of Crozet Island, Kerguelen Islands, and Heard Island for the duration of the tracking study. Seals that showed short displacements and less move persistence travelled more frequently

around areas of high ice concentration. Overall, our integrated genetic and telemetry analyses provided longer-term insights into the seals' natal affiliations and migration strategies, and additional short-term information on their annual life-cycle movements and foraging ecology.

The genetic data from 12 SES collected at Davis Base suggested high nucleotide diversity and haplotypes shared with elephant seals from other breeding colonies within the South Atlantic Ocean, South Indian Ocean, and South Pacific Ocean. However, given the small sample size, our study might not be representative of the larger population of all male SES at Davis Base. Replication of this study with a larger sample size would assist in describing more comprehensively the genetic make-up of this population. Our key findings are that 11 of the 12 seals had unique mitochondrial DNA haplotypes and one seal shared a haplotype with seals from Macquarie Island. Migration and mixing between the Kerguelen and Macquarie stocks has not been observed previously. Seals from Macquarie Island form a monophyletic group and are one of the four major breeding stocks of SES. The other 11 seals from Davis Base showed mixed affinities to island populations of two other major breeding stocks: those of the South Indian Ocean (Marion Island and Heard Island), and South Atlantic Oceans (King George Islands, Falkland Islands, and Elephant Island). These two breeding stocks display extensive gene flow and intermixing, as shown by the sharing of haplotypes between stocks. Two of these individuals (56\_SES and 64\_SES) shared a known haplotype with seals from Marion Island only.

## Animal tracking analyses

The male seals from our study spent more time in areas of high ice concentration and typically involved intense search behaviours exemplified by highly tortuous movements. Similar patterns have been observed previously in male seals that adopted sea-ice foraging strategies rather than pelagic foraging (Labrousse et al. 2017; Rodríguez et al. 2017; Jonsen et al. 2019; Hindell et al. 2021). Moreover, the preferences of foraging locations along the Kerguelen Plateau were shown by seal 50\_SES, which had less move persistence near Kerguelen Islands. Five other seal tracks (44\_SES, 48\_SES, 50\_SES, 56\_SES, and 62\_SES) showed patterns of inter-island movements by outbound trips made towards the Kerguelen Plateau and Crozet Islands, which might indicate pelagic foraging trips away from the ice shelf areas. Similarly, seal 48\_SES showed less move persistence and had the second-longest maximum displacement per day around Crozet Islands (which is approximately 6,900 km from its natal affinity, Macquarie Island). This suggests a long-distance dispersal event to gain foraging (and potentially future breeding) advantage away from the seal's natal location.

SES are philopatric to breeding and foraging sites, so long-distance dispersal events are rare, particularly for a juvenile seal (Hindell and McMahon 2000; Reisinger and Bester 2010). Our findings show that the only two male juvenile seals, out of the 12 seals included in this study, remained close to the ice shelf region to forage close to Davis Base, which was indicated by the reduced move persistence. Seals that remain close to the ice shelf region might have easier access to sea-ice polynyas where their prey (myctophids and ice fish) may be more easily found (Labrousse et al. 2017). However, a previous study found that a juvenile female from Macquarie Island was sighted at Peter 1 Øy, which is approximately 5,200 km to the east (Hindell and McMahon 2000). This finding corresponds with that observed here of 48\_SES (Macquarie Island natal affinity), which foraged around Crozet Islands, as discussed above. The parallel finding between this study and previous studies might indicate a lack of resource availability around Macquarie Island where the population has been in decline in



recent decades (McMahon et al. 2005a), which could be forcing seals from this location to disperse farther to find food.

### **Changes to foraging site and the consequences on populations**

The Kerguelen Plateau is a popular foraging location for male SES. However, there are high levels of predation on SES here (Hindell et al. 2021), which might have caused terminations of seal tracking signals. The Kerguelen Plateau lies within the Antarctic Polar Front boundary, which is an area of elevated productivity for most Antarctic marine species due to the decrease in water temperature down to 2°C at 200 m, and the distribution of water masses and associated abundance of primary producers (O'Toole et al. 2014; Cristofari et al. 2018). SES will often forage on the Antarctic Continental Shelf and Polar Front, and because they are a deep-diving species, sea-surface temperatures have less of an effect on their diving behaviours (Hindell et al. 1991; O'Toole et al. 2014). Alternatively, previous studies have found that seals have greater foraging opportunities in colder waters, particularly along the Antarctic shelf; temperatures slow down the movements of prey, allowing their capture with less energy expenditure from the seals (Bailleul et al. 2007).

Popular foraging locations around the Kerguelen Plateau, such as Crozet Islands and Kerguelen Islands, have been reported to show either a slight increase or a stabilization in SES population numbers over the last decade (Guinet et al. 2004). The stabilized population numbers might have been caused by the seals' inter-island movements and foraging between islands in the Kerguelen province, including Marion Island, Crozet Islands, Kerguelen Islands, and Heard Island (Oosthuizen et al. 2011). However, despite showing philopatry to foraging sites, the seals' foraging strategies and movements might shift based on the changes to oceanic conditions that will influence where resources are available (Bailleul et al. 2007). Moreover, poor foraging success by females has led to a decrease in first-year pup survival and would thus reduce reproductive success in populations such as Macquarie Island (Arnbom et al. 1997; McMahon et al. 2003; Clausius et al. 2017; Mestre et al. 2020). As oceanic conditions continue to change with climate, the entire marine ecosystem will also shift. Therefore, the lack of resources around Macquarie Island is likely to continue causing decreases in population size (McMahon et al. 2005a; Clausius et al. 2017).

### **Population declines impacted by climate change**

Broad climate events such as El Niño can affect the oceanic structure of the Southern Ocean. The Southern Ocean ecosystem relies heavily on phytoplankton and krill abundance for other species' survival, previously reported for Antarctic whales, king penguins, and SES (McIntyre et al. 2014; Cristofari et al. 2018; Bestley et al. 2020; Rogers et al. 2020; Agrelo et al. 2021; Volzke et al. 2021). Over the last four decades, the global southern elephant seal population has seen dramatic declines in some populations due to the changes in food availability (McMahon et al. 2005a; Volzke et al. 2021). Populations of the four main breeding stocks, South Georgia, Kerguelen Islands and Heard Island, Macquarie Island, and Peninsula Valdés, have all decreased since the 1970s. However, presently all the populations bar the Macquarie population are either stable or increasing (McMahon et al. 2005b; Hindell et al. 2016). A more thorough understanding of seal foraging behaviour, the selection and variations in foraging sites, and how this is expressed and transmitted within a population is

central to understanding how foraging site selection affects population growth and ultimately population variability.

In summary, we were able to identify the natal locations of the 12 Davis Base seals through genetic data. We combined findings from genetic data with satellite telemetry tracking data and identified that the majority of the seals are spending most of the time foraging along the Kerguelen Plateau. Our data suggest that a seal from Macquarie Island has travelled a long distance, probably to gain a foraging advantage over its conspecifics. Long-range migrations and dispersal to distant feeding grounds might be one way for seals to maximize foraging efficiency, which may affect population growth rates through changes in survival and reproduction.

**Acknowledgements** We thank the Integrated Marine Observing System (IMOS) team for collecting and providing the elephant seal samples and tracking data. IMOS is a national collaborative research infrastructure, supported by the Australian Government and operated by a consortium of institutions as an unincorporated joint venture, with the University of Tasmania as Lead Agent. S.Y.W.H. was funded by the Australian Research Council. Colleagues in the Molecular Ecology, Evolution, and Phylogenetics Lab provided advice and support throughout this project.

**Author contributions** C.R.M. conducted Antarctic fieldwork and collected data. M.C. did the molecular lab work, conducted molecular and tracking data analyses, and wrote the first draft of the manuscript. I.J. provided guidance on and contributed to tracking data analysis. S.Y.W.H, C.R.M., and M.d.B supervised the research project. All authors revised and contributed to the writing of the final manuscript.

## **Declarations**

**Conflict of interest** The authors declare that they have no conflicts of interest.

## **References**

- Agrelo M, Daura-Jorge FG, Rowntree VJ, Sironi M, Hammond PS, Ingram SN, Marón CF, Vilches FO, Seger J, Payne R, Simões-Lopes PC (2021) Ocean warming threatens southern right whale population recovery. *Sci Adv* 7:eabh2823
- Arnabom T, Fedak MA, Boyd IL (1997) Factors affecting maternal expenditure in southern elephant seals during lactation. *Ecology* 7:471–483
- Australian Antarctic Program (2020) Davis Environment. Australian Government: Australian Antarctic Division. <https://www.antarctica.gov.au/antarctic-operations/stations/davis/environment/>. Accessed 14 October 2021.
- Bailleul F, Charrassin JB, Monestiez P, Roquet F, Biuw M, Guinet C (2007) Successful foraging zones of southern elephant seals from the Kerguelen Islands in relation to oceanographic conditions. *Philos Trans R Soc B* 362:2169–2181

- 391 Bester MN (1988) Marking and monitoring studies of the Kerguelen stock of southern  
392 elephant seals *Mirounga leonina* and their bearing on biological research in the  
393 Vestfold Hills. *Hydrobiologia* 165:269–277
- 394 Bester MN (2021) Status of pinnipeds on mid-Atlantic ridge islands, South Atlantic Ocean.  
395 *Polar Biol* 44:865–871
- 396 Bestley S, Ropert-Coudert Y, Nash SB, Brooks CM, Cotte C, Dewar M, Friedlaender AS,  
397 Jackson JA, Labrousse S, Lowther AD, McMahon CR, Phillips RA, Pistorius P, Puskic  
398 PS, Reis AOA, Reisinger RR, Santos M, Tarszisz E, Tixier P, Trathan PN, Wege M,  
399 Wienecke B (2020) Marine ecosystem assessment for the Southern Ocean: birds and  
400 marine mammals in a changing climate. *Front Ecol Evol* 8:566936
- 401 Bogdanowicz W, Pilot M, Gajewska M, Suchecka E, Golachowski M (2013) Genetic  
402 diversity in a moulting colony of southern elephant seals in comparison with breeding  
403 colonies. *Mar Ecol Progr Ser* 478:287–300
- 404 Bryndum-Buchholz A, Tittensor DP, Blanchard JL, Cheung WWL, Coll M, Galbraith ED,  
405 Jennings S, Maury O, Lotze HK (2019) Twenty-first-century climate change impacts  
406 on marine animal biomass and ecosystem structure across ocean basins. *Glob Change*  
407 *Biol* 25:459–472
- 408 Chauke LF (2008) Genetic variation and population structure of southern elephant seals  
409 *Mirounga leonina* from Marion Island. Dissertation, University of Pretoria.
- 410 Clausius E, McMahon CR, Hindell MA (2017) Five decades on: Use of historical weaning  
411 size data reveals that a decrease in maternal foraging success underpins the long-term  
412 decline in population of southern elephant seals (*Mirounga leonina*). *PLOS ONE* 12:  
413 e0173427
- 414 Cristofari R, Liu X, Bonadonna F, Cherel Y, Pistorius P, Maho YL, Raybaud V, Stenseth  
415 NC, Bohec CL, Trucchi E (2018) Climate-driven range shifts of the king penguin in a  
416 fragmented ecosystem. *Nat Clim Change* 8:245–251
- 417 Curtis C, Stewart BS, Karl SA (2009) Pleistocene population expansions of Antarctic seals.  
418 *Mol Ecol* 18:112–121
- 419 de Bruyn M, Hall BL, Chauke LF, Baroni C, Koch PL, Hoelzel AR (2009) Rapid response of  
420 a marine mammal species to holocene climate and habitat change. *PLOS Genet*  
421 5:e1000554
- 422 de Kock L, Oosthuizen WC, Beltran RS, Bester MN, de Bruyn PJN (2021) Determinants of  
423 moult haul-out phenology and duration in southern elephant seals. *Sci Rep* 11:13331
- 424 Fabiani A (2002). Molecular ecology of southern elephant seals (*Mirounga leonina*): mating  
425 system and population genetics. Dissertation, Durham University.
- 426 Field IC, Bradshaw CJA, McMahon CR, Harrington J, Burton HR (2002) Effects of age, size  
427 and condition of elephant seals (*Mirounga leonina*) on their intravenous anaesthesia  
428 with tiletamine and zolazepam. *Vet Rec* 151:235–240

- 429 Fu YX (1997) Statistical tests of neutrality of mutations against population growth,  
430 hitchhiking and background selection. *Genetics* 147:915–925
- 431 Goedegebuure M, Melbourne-Thomas J, Corney SP, McMahon CR, Hindell MA (2018)  
432 Modelling southern elephant seals *Mirounga leonina* using an individual-based model  
433 coupled with a dynamic energy budget. *PLOS ONE* 13:e0194950
- 434 Guinet C, Jouventin P, Weimerskirch H (2004) Recent population change of the southern  
435 elephant seal at Îles Crozet and Îles Kerguelen: the end of the decrease? *Antarct Sci*  
436 11:193–197
- 437 Heck KL, van Belle G, Simberloff D (1975) Explicit calculation of the rarefaction diversity  
438 measurement and the determination of sufficient sample size. *Ecology* 56:1459–1461
- 439 Henderson AF, McMahon CR, Harcourt R, Guinet C, Picard B, Wotherspoon S, Hindell MA  
440 (2020) Inferring variation in Southern Elephant Seal at-sea mortality by modelling tag  
441 failure. *Front Mar Sci* 7:517901
- 442 Hindell MA, Burton HR (1988) The history of the elephant seal industry at Macquarie Island  
443 and an estimate of pre-sealing numbers. *Pap Proc R Soc Tasmania* 122:159–176
- 444 Hindell MA, Burton HR, Slip DJ (1991) Foraging areas of southern elephant seals, *Mirounga*  
445 *leonina*, as inferred from water temperature data. *Aust J Mar Freshwater Res* 42:115–  
446 128
- 447 Hindell MA, McMahon CR (2000) Long distance movement of a southern elephant seal  
448 (*Mirounga leonina*) from Macquarie Island to Peter I ØY. *Mar Mammal Sci* 16:504–  
449 507
- 450 Hindell MA, McMahon CR, Bester MN, Boehme L, Costa D, Fedak MA, Guinet C, Herraiz-  
451 Borreguero L, Harcourt RG, Huckstadt L, Kovacs, KM, Lydersen C, McIntyre T,  
452 Muelbert MMC, Patterson T, Roquet F, Williams G, Charrassin JB (2016) Circumpolar  
453 habitat use in the southern elephant seal: implications for foraging success and  
454 population trajectories. *Ecosphere* 7:e01213
- 455 Hindell MA, Sumner M, Bestley S, Wotherspoon S, Harcourt R, Lea M-A, Alderman R,  
456 McMahon CR (2017) Decadal changes in habitat characteristics influence population  
457 trajectories of southern elephant seals. *Glob Change Biol* 23:5136–5150
- 458 Hindell MA, Reisinger RR, Ropert-Coudert Y, Hückstädt LA, Trathan PN, et al. (2020)  
459 Tracking of marine predators to protect Southern Ocean ecosystems. *Nature* 580:87–92
- 460 Hindell MA, McMahon CR, Jonsen I, Harcourt R, Arce F, Guinet C (2021) Inter- and  
461 intrasex habitat partitioning in the highly dimorphic southern elephant seal. *Ecol Evol*  
462 11:1620–1633
- 463 Hoelzel AR, Campagna C, Arnborn T (2001) Genetic and morphometric differentiation  
464 between island and mainland southern elephant seal populations. *Proc Biol Sci*  
465 268:325–332

- 466 Hoelzel AR, Halley J, O'Brien SJ, Campagna C, Arnborn T, Le Boeuf B, Ralls K, Dover GA  
467 (1993) Elephant seal genetic variation and the use of simulation models to investigate  
468 historical population bottlenecks. *J Hered* 84:443–449
- 469 Horning M, Andrews RD, Bishop AM, Boveng PL, Costa DP, Crocker DE, Haulena M,  
470 Hindell M, Hindle AG, Holser RR, Hooker SK, Hückstädt LA, Johnson S, Lea MA,  
471 McDonald BI, McMahon CR, Robinson PW, Sattler RL, Shuert CR, Steingass SM,  
472 Thompson D, Tuomi PA, Williams CL, Womble JN (2019) Best practice  
473 recommendations for the use of external telemetry devices on pinnipeds. *Anim*  
474 *Biotelem* 7:20
- 475 Hurlbert SH (1971) The non-concept of species diversity: a critique and alternative  
476 parameters. *Ecology* 52:577–586
- 477 Jenouvrier S, Che-Castaldo J, Wolf S, Holland M, Labrousse S, LaRue M, Wienecke B,  
478 Fretwell P, Barbraud C, Greenwald N, Stroeve J, Trathan PN (2021) The call of the  
479 emperor penguin: Legal responses to species threatened by climate change. *Glob*  
480 *Change Biol* 27:5008–5029
- 481 Jonsen ID, McMahon CR, Patterson TA, Auger-Méthé M, Harcourt R, Hindell MA, Bestley  
482 S (2019) Movement responses to environment: fast inference of variation among  
483 southern elephant seals with a mixed effects model. *Ecology* 100:e02566
- 484 Jonsen ID, Patterson TA (2020) foieGras: fit latent variable movement models to animal  
485 tracking data for location quality control and behavioural inference. R package version  
486 0.7-6. <https://CRAN.R-project.org/package=foieGras>
- 487 Jonsen ID, Patterson TA, Costa DP, Doherty PD, Godley BJ, et al. (2020) A continuous-time  
488 state-space model for rapid quality control of argos locations from animal-borne tags.  
489 *Move Ecol* 8:31
- 490 Kearse M, Moir R, Wilson A, Stones-Havas S, Cheung M, Sturrock S, Buxton S, Cooper A,  
491 Markowitz S, Duran C, Thierer T, Ashton B, Meintjes P, Drummond A (2012)  
492 Geneious Basic: An integrated and extendable desktop software platform for the  
493 organisation and analysis of sequence data. *Bioinformatics* 28:1647–1649
- 494 Kumar S, Stecher G, Li M, Knyaz C, Tamura K (2018) MEGA X: Molecular Evolutionary  
495 Genetics Analysis across computing platforms. *Mol Biol Evol* 35:1547–1549
- 496 Labrousse S, Sallee JB, Fraser AD, Massom RA, Reid P, Sumner M, Guinet C, Harcourt R,  
497 McMahon CR, Bailleul F, Hindell MA, Charrassin JB (2017) Under the sea ice:  
498 Exploring the relationship between sea ice and the foraging behaviour of southern  
499 elephant seals in East Antarctica. *Progr Oceanogr* 156:17–40
- 500 Laidre KL, Born EW, Atkinson SN, Wiig Ø, Andersen LW, Lunn NJ, Dyck M, Regehr EV,  
501 McGovern R, Heagerty P (2018) Range contraction and increasing isolation of polar  
502 bear subpopulation in an era of sea-ice loss. *Ecol Evol* 8:2062–2075
- 503 Le Boeuf BJ, Law RM (1994) Elephant seals: population ecology, behaviour, and  
504 physiology. University of California Press, Berkeley.



505 Leigh JW, Bryant D (2015) POPART: full-feature software for haplotype network  
506 construction. *Methods Ecol Evol* 6:1110–1116

507 McIntyre T, Bornemann H, de Bruyn PJN, Reisinger RR, Steinhage D, Márquez MEI, Bester  
508 MN, Plötz J (2014) Environmental influences on the at-sea behaviour of a major  
509 consumer, *Mirounga leonina*, in a rapidly changing environment. *Polar Res* 33:23808

510 McMahon CR, Bester MN, Burton HR, Hindell MA, Bradshaw CJA (2005a) Population  
511 status, trends and a re-examination of the hypotheses explaining the recent declines of  
512 the southern elephant seal *Mirounga leonina*. *Mammal Rev* 35:82–100

513 McMahon CR, Burton H (2005) Climate change and seal survival: evidence for  
514 environmentally mediated changes in elephant seal, *Mirounga leonina*, pup survival.  
515 *Proc R Soc B* 272:923–928

516 McMahon CR, Burton H, Bester MN (2003) A demographic comparison of two southern  
517 elephant seal populations. *J Anim Ecol* 72:61–74

518 McMahon CR, Burton HR, McLean S, Slip D, Bester MN (2000). Field immobilisation of  
519 southern elephant seals with intravenous tiletamine and zolazepam. *Vet Rec* 146:251–  
520 254.

521 McMahon CR, Field IC, Bradshaw CJA, White GC, Hindell MA (2008) Tracking and data-  
522 logging devices attached to elephant seals do not affect individual mass gain or  
523 survival. *J Exp Mar Biol Ecol* 360:71–77

524 McMahon CR, Hindell MA, Burton HR, Bester MN (2005b) Comparison of southern  
525 elephant seal populations, and observations of a population on a demographic knife-  
526 edge. *Mar Ecol Progr Ser* 288:273–283

527 McMahon CR, Roquet F, Baudel S, Belbeoch M, Bestley S, Blight C, Boehme L, Carse F,  
528 Costa DP, Fedak MA, Guinet C, Harcourt R, Heslop E, Hindell MA, Hoenner X,  
529 Holland K, Holland M, Jaine FRA, Jeanniard Du Dot T, Jonsen ID, Keates TR, Kovacs  
530 KM, Labrousse S, Lovell P, Lydersen C, March D, Mazloff M, McKinzie MK,  
531 Muelbert MMC, O’Brien KM, Phillips LR, Portela E, Pye J, Rintoul S, Sato K,  
532 Sequeira AMM, Simmons SE, Tsontos VM, Turpin V, van Wijk E, Vo D, Wege M,  
533 Whoriskey FG, Wilson K, Woodward BE (2021) Animal Borne Ocean Sensors –  
534 AniBOS – an essential component of the Global Ocean Observing System (GOOS)  
535 *Front Mar Sci* 8:751840

536 McMahon CR, Thums M, Bradshaw M, Busby S, Chapple V, Evans M, Goodlich S, Holland  
537 C, Raudino H, Rebuck P, Hindell MA (2017) It’s a girl! A female southern elephant  
538 seal born in Western Australia. *Aust J Zool* 65:179–182

539 Mestre J, Authier M, Cherel Y, Harcourt R, McMahon CR, Hindell MA, Charrassin JB,  
540 Guinet C (2020) Decadal changes in blood  $\delta^{13}\text{C}$  values, at-sea distribution, and weaning  
541 mass of southern elephant seals from Kerguelen Islands. *Proc R Soc B* 287:20201544

542 Myers AE, Lovell P, Hays GC (2006) Tools for studying animal behaviour: validation of dive  
543 profiles relayed via the Argos satellite system. *Anim Behav* 71:989–993

- 544 Oksanen J, Blanchet FG, Friendly M, Kindt R, Legendre P, McGlinn D, Minchin PR, O'Hara  
545 RB, Simpson GL, Solymos P, Stevens MHH, Szoecs E, Wagner H (2020) vegan:  
546 Community ecology package. R package version 2.5-6. 2019. [https://cran.r-](https://cran.r-project.org/package=vegan)  
547 [project.org/package=vegan](https://cran.r-project.org/package=vegan)
- 548 Oosthuizen WC, Bester MN, Tosh CA, Guinet C, Besson D, de Bruyn PJN (2011) Dispersal  
549 and dispersion of southern elephant seals in the Kerguelen province, Southern Ocean.  
550 *Antarct Sci* 23:567–577
- 551 O'Toole M, Hindell MA, Charrassin JB, Guinet C (2014) Foraging behaviour of the southern  
552 elephant seals over the Kerguelen Plateau. *Mar Ecol Progr Ser* 502:281–294
- 553 Parkinson CL (2019) A 40-y record reveals gradual Antarctic sea ice increases followed by  
554 decreases at rates far exceeding the rates seen in the Arctic. *Proc Natl Acad Sci USA*  
555 116:14414–14423
- 556 Reisinger RR, Bester MN (2010) Long distance breeding dispersal of a southern elephant  
557 seal. *Polar Biol* 33:1289–1291
- 558 Rodríguez JP, Fernández-García J, Thums M, Hindell MA, Sequeira AMM, Meekan MG,  
559 Costa DP, Guinet C, Harcourt RG, McMahon CR, Muelbert M, Duarte CM, Eguíluz  
560 VM (2017) Big data analyses reveal patterns and drivers of the movements of southern  
561 elephant seals. *Sci Rep* 7:112
- 562 Rogers AD, Frinault BAV, Barnes DKA, Bindoff NL, Downie R, Ducklow HW,  
563 Friedlaender AS, Hart T, Hill SL, Hofmann EE, Linse K, McMahon CR, Murphy EJ,  
564 Pakhomov EA, Reygondeau G, Staniland IJ, Wolf-Gladrow DA, Wright R (2020)  
565 Antarctic futures: An assessment of climate-driven changes in ecosystem structure,  
566 function, and service provisioning in the Southern Ocean. *Ann Rev Mar Sci* 12:87–120
- 567 Rozas J, Ferrer-Mata A, Sanchez-Delbarrio JC, Guirao-Rico S, Librado P, Ramos-Onsins SE,  
568 Sanchez-Gracia A (2017) DnaSP v6: DNA sequence polymorphism analysis of large  
569 datasets. *Mol Biol Evol* 34:3299–3302
- 570 Siebert M, Atkinson A, Banwell A, Brandon M, Convey P, Davies B, Downie R, Edwards T,  
571 Hubbard B, Marshall G, Rogelj J, Rumble J, Stroeve J, Vaughan D (2019) The  
572 Antarctic Peninsula under a 1.5°C global warming scenario. *Front Environ Sci* 7:102
- 573 Slade RW, Moritz C, Heideman A (1994) Multiple nuclear-gene phylogenies: application to  
574 pinnipeds and comparison with a mitochondrial DNA gene phylogeny. *Mol Biol Evol*  
575 11:341–356
- 576 Slade RW, Moritz C, Hoelzel AR, Burton HR (1998) Molecular population genetics of the  
577 southern elephant seal *Mirounga leonina*. *Genetics* 149:1945–1957
- 578 Stowell SML, Bentley EG, Gagne RB, Gustafson KD, Rutledge LY, Ernest HB (2018)  
579 Optimal DNA extractions from blood on preservation paper limits conversation  
580 genomic but not conservation genetic applications. *J Nat Conserv* 46:89–96
- 581 Tierney TJ (1977) The southern elephant seal, *Mirounga leonina* (L.), in the Vestfold Hills,  
582 Antarctica. *Aust Wildl Res* 4:13–24

- 583 van den Hoff J, Burton H (2007) The population trend of southern elephant seals (*Mirounga*  
584 *leonina* L.) at Macquarie Island (1952-2004). Polar Biol 30:1275–1283
- 585 Volzke S, McMahon CR, Hindell MA, Burton HR, Wotherspoon SJ (2021) Climate  
586 influences on female survival in a declining population of southern elephant seals  
587 (*Mirounga leonina*). Ecol Evol 11:11333–11344
- 588 Wilkinson IS, Bester MN (1997) Tag-loss in southern elephant seals, *Mirounga leonina*, at  
589 Marion Island. Antarct Sci 9:162–167
- 590 Zappes IA, Fabiani A, Sbordoni V, Rakaj A, Palozzi R, Allegrucci G (2017) New data on  
591 Weddell seal (*Leptonychotes weddellii*) colonies: A genetic analysis of a top predator  
592 from the Ross Sea, Antarctica. PLOS ONE 12:e0182922

**Table 1.** Male southern elephant seals (*Mirounga leonina*) with tracking tags. Weights of 54\_SES and 64\_SES were not taken. Data were collected at Davis Base, Antarctica (68° 34' 36" S, 77° 58' 03" E).

| Sample Label | Age Class | Mass (kg) | Tag date (d-m-y) |
|--------------|-----------|-----------|------------------|
| 42_SES       | Subadult  | 338       | 17-01-2016       |
| 44_SES       | Subadult  | 320       | 15-02-2016       |
| 46_SES       | Subadult  | 406       | 17-02-2016       |
| 48_SES       | Subadult  | 392       | 20-02-2016       |
| 50_SES       | Subadult  | 299       | 07-02-2017       |
| 52_SES       | Subadult  | 309       | 16-02-2017       |
| 54_SES       | Juvenile  | NA        | 16-02-2017       |
| 56_SES       | Subadult  | 265       | 16-02-2017       |
| 58_SES       | Subadult  | 345       | 20-02-2017       |
| 60_SES       | Subadult  | 237       | 21-02-2017       |
| 62_SES       | Subadult  | 380       | 23-02-2017       |
| 64_SES       | Juvenile  | NA        | 25-02-2017       |

**Table 2.** Pairwise mitochondrial genetic distances (nucleotide substitutions per site) between seals from eight population groups and Davis Base. Estimated standard errors for all values were approximately 0.01. Bold font denotes the largest nucleotide pairwise distance, between seals from Macquarie Island and Península Valdés. Location groups are: Macquarie Island (MQ), Marion Island (MR), Falkland Islands (FI), Elephant Island (EI), South Georgia (SG), Heard Island (HD), King George Island (KG), Península Valdés (PV).

|                   | <b>MQ</b>    | <b>MR</b> | <b>FI</b> | <b>EI</b> | <b>SG</b> | <b>HD</b> | <b>KG</b> | <b>PV</b> |
|-------------------|--------------|-----------|-----------|-----------|-----------|-----------|-----------|-----------|
| <b>MR</b>         | 0.050        |           |           |           |           |           |           |           |
| <b>FI</b>         | 0.053        | 0.030     |           |           |           |           |           |           |
| <b>EI</b>         | 0.049        | 0.031     | 0.033     |           |           |           |           |           |
| <b>SG</b>         | 0.052        | 0.032     | 0.035     | 0.033     |           |           |           |           |
| <b>HD</b>         | 0.050        | 0.027     | 0.030     | 0.032     | 0.033     |           |           |           |
| <b>KG</b>         | 0.047        | 0.027     | 0.029     | 0.029     | 0.030     | 0.027     |           |           |
| <b>PV</b>         | <b>0.065</b> | 0.042     | 0.043     | 0.047     | 0.039     | 0.039     | 0.040     |           |
| <b>Davis Base</b> | 0.049        | 0.030     | 0.033     | 0.034     | 0.036     | 0.031     | 0.030     | 0.044     |



**Table 3.** Statistical summary data for all southern elephant seal populations, including Davis Base seals. Statistics included are the following: the number of individuals ( $N$ ), haplotype diversity ( $H_d$ ), nucleotide diversity ( $\pi$ ), average number of nucleotide differences ( $k$ ), Fu's  $F_S$  statistic ( $F_S$ ), and haplotype richness based on a sample  $n = 12$  ( $r_{(12)}$ ).

| Population         | $N$ | $H_d \pm SD$    | $\pi (\%) \pm SD$ | $k$  | $F_S$  | $r_{(12)}$ |
|--------------------|-----|-----------------|-------------------|------|--------|------------|
| Macquarie Island   | 53  | $0.92 \pm 0.02$ | $2.50 \pm 0.002$  | 5.73 | -1.00  | 7.24       |
| Marion Island      | 50  | $0.98 \pm 0.01$ | $2.51 \pm 0.002$  | 5.71 | -24.87 | 7.53       |
| Falkland Islands   | 16  | $1.00 \pm 0.02$ | $3.16 \pm 0.002$  | 7.24 | -10.51 | 10.40      |
| Elephant Island    | 12  | $1.00 \pm 0.03$ | $3.29 \pm 0.002$  | 7.53 | -6.13  | 8.00       |
| South Georgia      | 28  | $0.99 \pm 0.01$ | $2.84 \pm 0.002$  | 6.51 | -18.42 | 9.13       |
| Heard Island       | 6   | $1.00 \pm 0.10$ | $2.42 \pm 0.005$  | 5.53 | -1.96  | 4.00       |
| King George Island | 23  | $0.91 \pm 0.05$ | $1.03 \pm 0.002$  | 2.22 | -9.55  | 8.56       |
| Península Valdés   | 32  | $1.00 \pm 0.27$ | $0.58 \pm 0.002$  | 1.33 | -1.22  | 2.00       |
| Davis Base         | 12  | $0.99 \pm 0.04$ | $2.52 \pm 0.004$  | 8.73 | -3.31  | 11.00      |
| All combined       | 203 | $0.96 \pm 0.01$ | $1.96 \pm 0.001$  | 4.20 | -60.75 |            |

**Table 4.** Southern elephant seal track summaries by maximum displacement from the track start ( $D_{\max}$ ), tracking deployment days (duration), maximum displacement scaled by deployment duration ( $D_{\max}.d_t$ ), and path tortuosity ( $\bar{r}$ ).

| Sample         | $D_{\max}$ (km) | duration (days) | $D_{\max}.d_t$ (km/day) | $\bar{r}$ |
|----------------|-----------------|-----------------|-------------------------|-----------|
| 42_SES         | 634.57          | 143.0           | 4.44                    | 0.07      |
| 44_SES         | 3055.92         | 270.0           | 11.32                   | 0.02      |
| 46_SES         | 1013.30         | 74.0            | 13.69                   | 0.06      |
| 48_SES         | 2967.28         | 305.0           | 9.73                    | 0.04      |
| 50_SES         | 2584.35         | 246.0           | 10.51                   | 0.13      |
| 52_SES         | 691.64          | 59.5            | 11.62                   | 0.10      |
| 54_SES         | 250.99          | 57.5            | 4.37                    | 0.02      |
| 56_SES         | 2234.81         | 216.0           | 10.35                   | 0.05      |
| 58_SES         | 142.90          | 48.0            | 2.98                    | 0.19      |
| 60_SES         | 28.66           | 22.0            | 1.30                    | 0.14      |
| 62_SES         | 2205.88         | 152.5           | 14.46                   | 0.06      |
| 64_SES         | 147.04          | 60.5            | 2.43                    | 0.05      |
| <b>Average</b> | 1329.78         | 137.8           | 8.10                    | 0.08      |

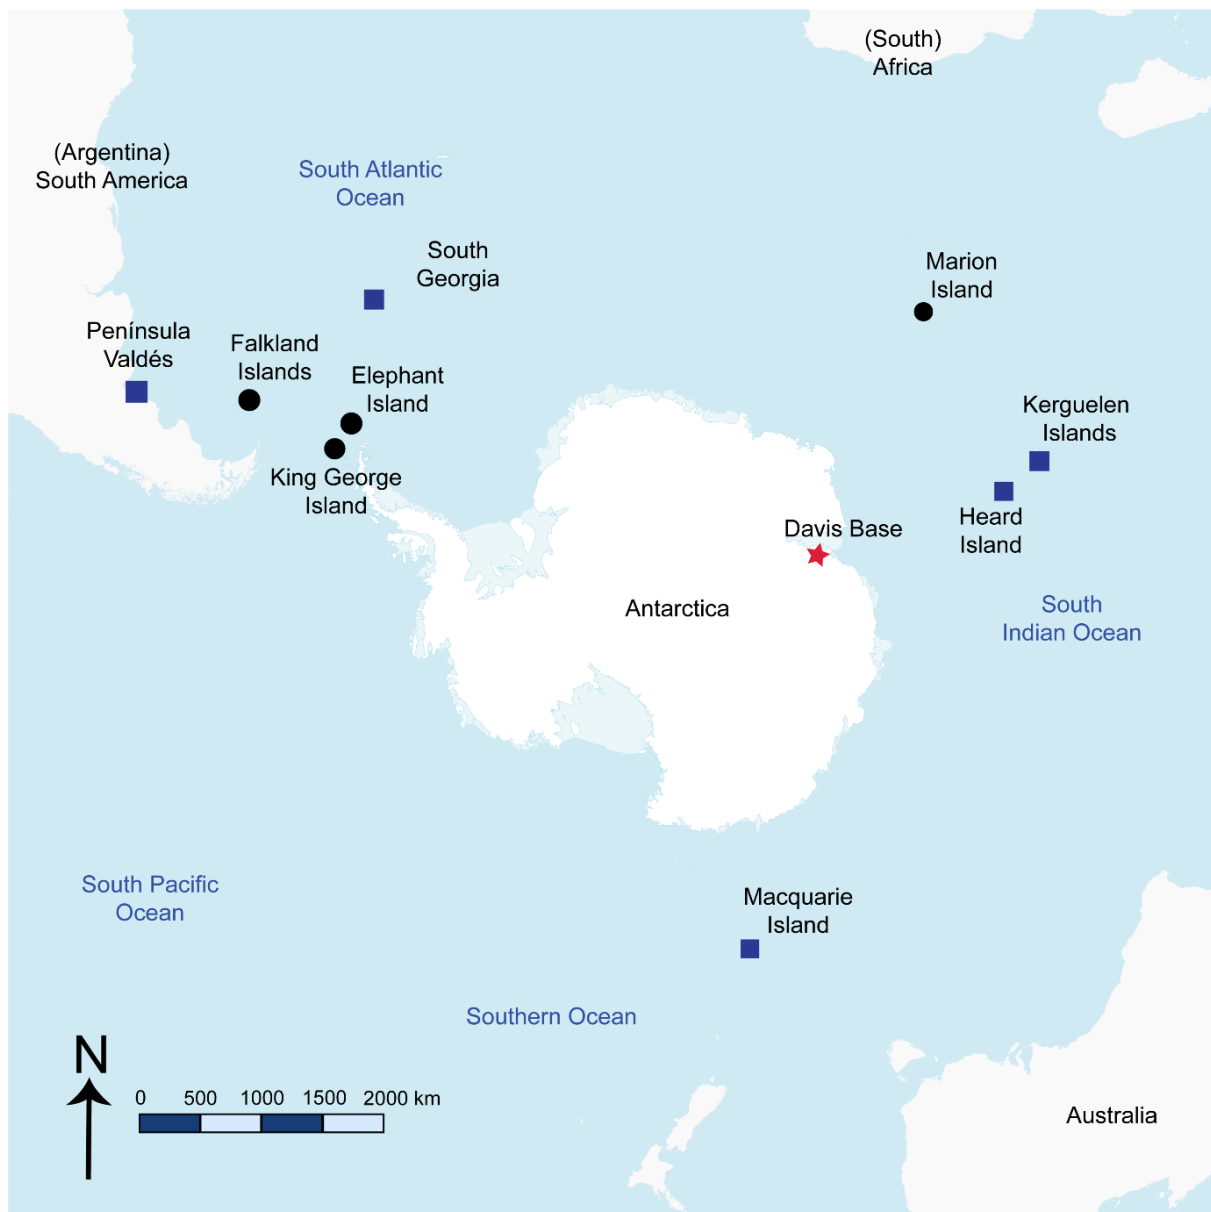

**Fig. 1** Circumpolar distribution of southern elephant seals around Antarctica. Blue squares represent the four main breeding stocks (South Georgia, Kerguelen Islands and Heard Island, Macquarie Island, and Península Valdés in Argentina). Black circles represent smaller breeding colonies (Marion Island, King George Island, Elephant Island, and Falkland Islands). The red star represents the sample collection site (Davis Base, Antarctica) for this study. Outline of continents and island locations are from Free Vector Maps.

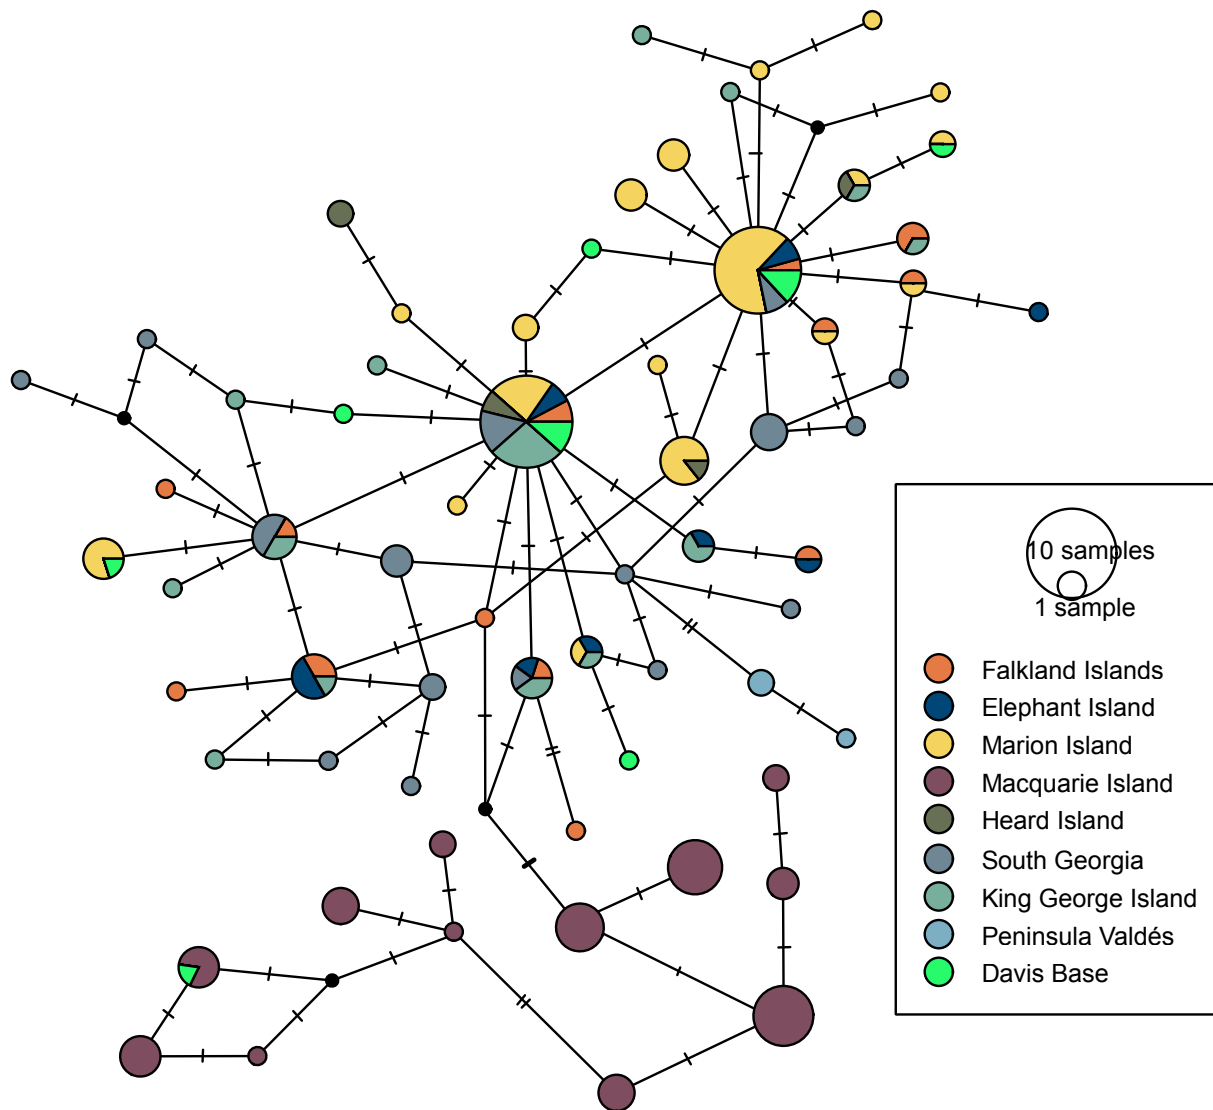

**Fig. 2** Median-joining network of mitochondrial haplotypes shared between southern elephant seals from Davis Base and all other major populations. Sizes of circles represent the number of individuals per haplotype. Each colour in the pie charts represents a unique population group. Davis Base samples are indicated as light green. The Weddell seal outgroup is shown by a red arrow and is separated by 80 mutations. Black dots represent unobserved haplotypes that have one mutational step from adjacent haplotypes. Hatch marks on lines connecting haplotypes indicate mutations.

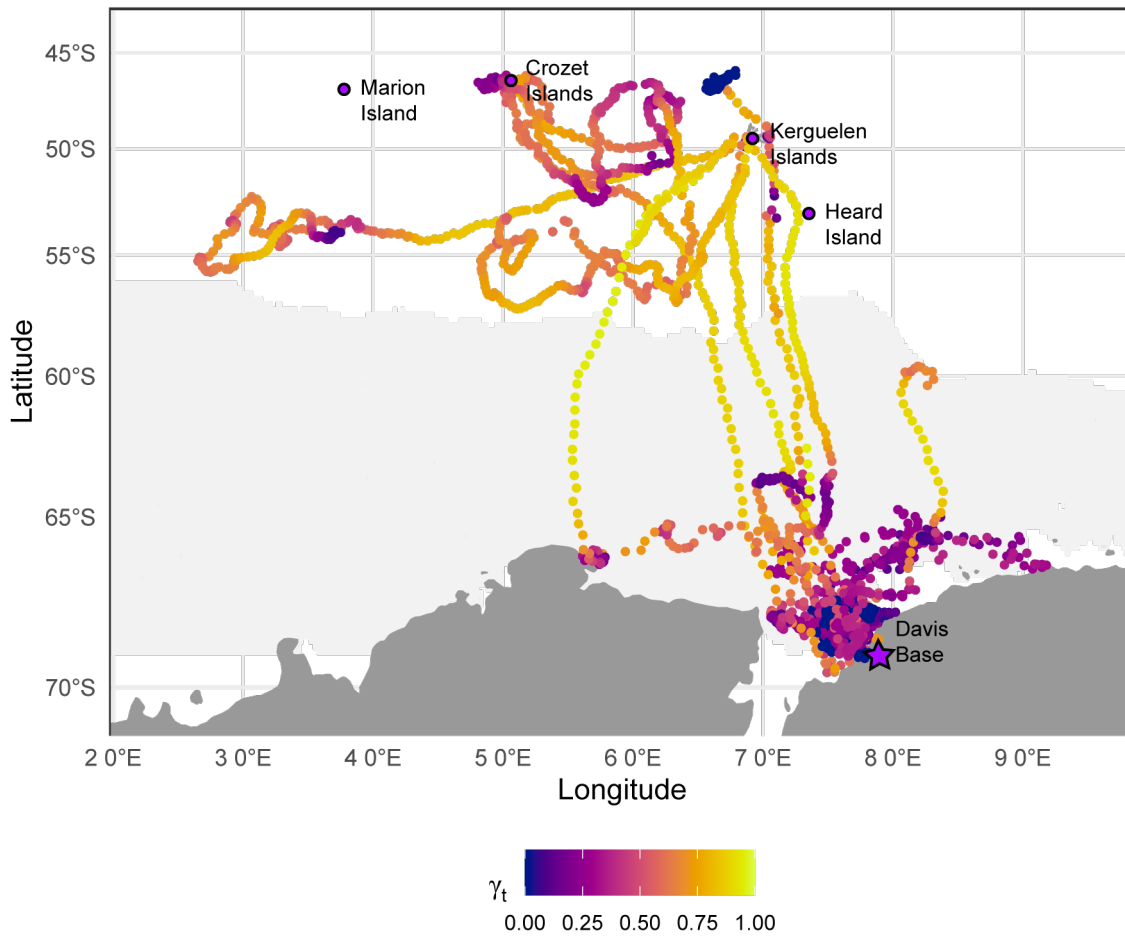

**Fig. 3** Map of sampled seals' move persistence by measure of path tortuosity.  $\gamma_t$  values approaching 1.00 (yellow) indicate relatively fast, directed movement.  $\gamma_t$  values approaching 0.00 (navy) indicate high tortuosity and slow movement. Davis Base is indicated by the purple star. Main breeding islands are represented by purple circles. Ice concentrations (maximum extent of sea ice coverage >15% during winter) are represented by light grey along the coastline.



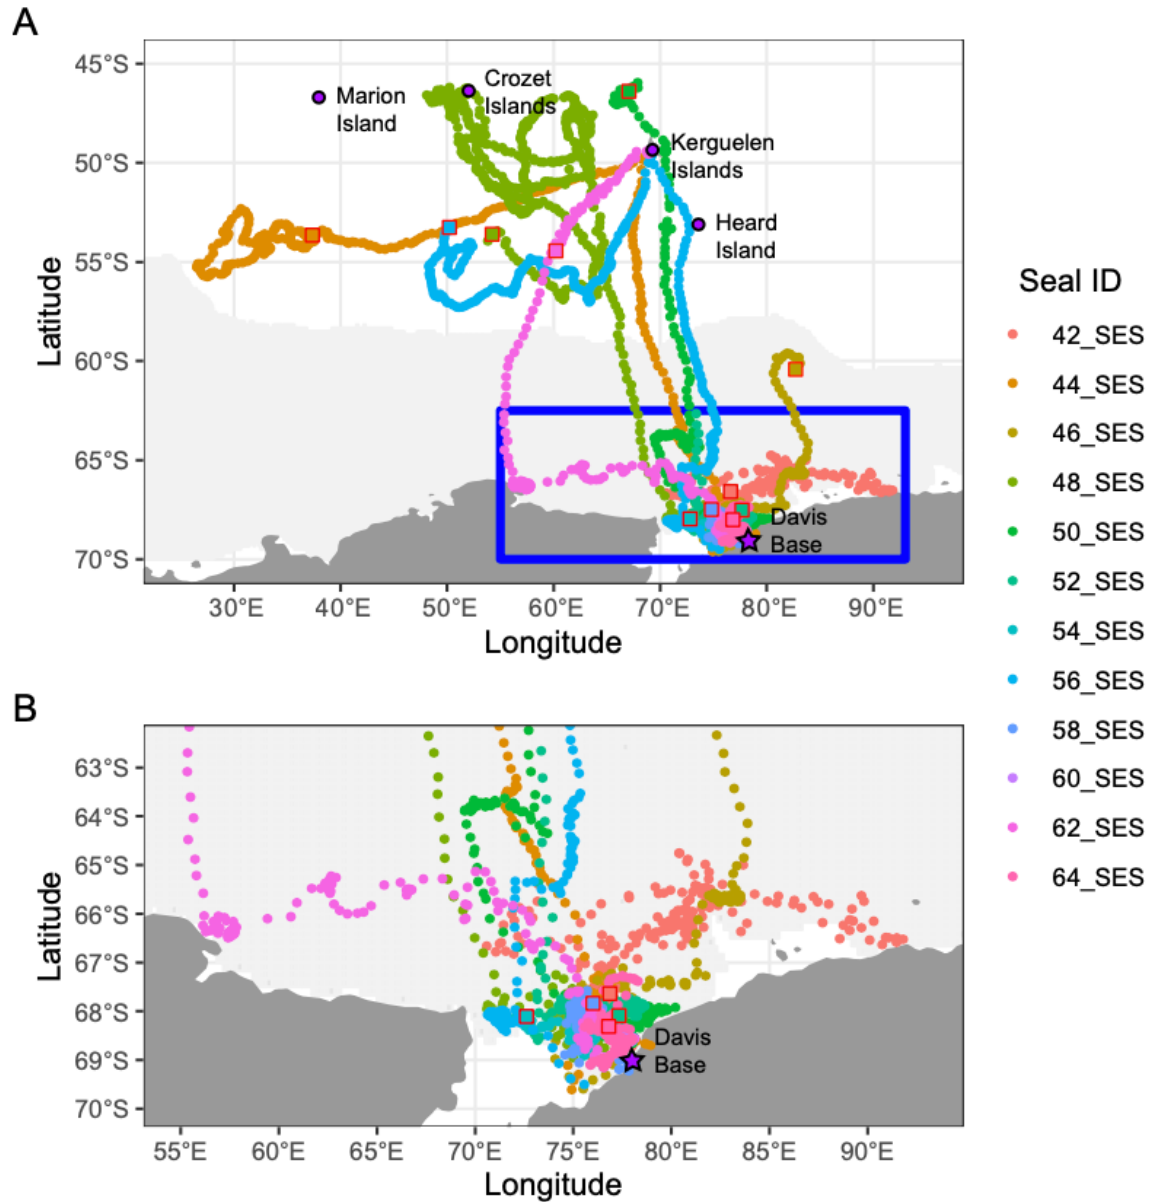

**Fig. 4** (A) State-space model predicted locations of all sampled seals. Seal 60\_SES failed to converge on predicted locations due to small scales and low contrasts of movement. The blue box indicates a narrowed view of the cluster of seal tracks close to Davis Base as seen in (B). The end track location of each seal is shown by a red outlined square. Davis Base is indicated by the purple star. Breeding islands are represented by purple circles. Ice concentrations (maximum extent of sea ice coverage >15% during winter) are represented by light grey along the coastline.
